# Supplementary material for: Sex-specific regulation of IL-10 production in human adipose tissue in obesity
Source: PubMed Central journal article supplement (PMC9606404; doi:10.3389/fendo.2022.996954), 2022-10-13
Supplement: DataSheet_1.pdf [file DataSheet_1.pdf]

## Supplementary Tables:

**Table S1:** Research resource identifiers (RRIDs) of the antibodies.

| Marker               | Conjugate | Clone    | Source     | Catalogue no. | Dilution | RRID        |
|----------------------|-----------|----------|------------|---------------|----------|-------------|
| CD45                 | AF700     | HI30     | BD         | 560566        | 1:80     | AB_1645452  |
| CD14                 | BV711     | MΦP9     | BD         | 563373        | 1:80     | AB_2744290  |
| CD11c                | Pe-Cy7    | B-Iy6    | BD         | 561356        | 1:80     | AB_10611859 |
| CD206                | BV421     | 19.2     | BD         | 564062        | 1:80     | AB_2738570  |
| CD163                | BV605     | GHI/61   | BD         | 745091        | 1:40     | AB_2742705  |
| IL-10                | APC       | JES3-9D7 | Biolegend  | 501410        | 1:20     | AB_315176   |
| Aqua dead cell stain |           |          | Invitrogen | L34957        | 1:1000   |             |

Antibodies, clone, catalogue number, dilution for all the markers used for flow cytometry are listed along with RRIDs.

**Table S2:** Multiple regression of WAT IL-10 with other WAT cytokines

| IL-10        | Women          |                  | Men            |              |
|--------------|----------------|------------------|----------------|--------------|
|              | $\beta$ -coeff | p-value          | $\beta$ -coeff | p-value      |
| IL-6         | 0.391          | <b>0.01</b>      | 0.226          | <b>0.033</b> |
| MCP-1        | 0.588          | <b>&lt;0.001</b> | 0.349          | <b>0.001</b> |
| TNF $\alpha$ | 0.428          | <b>0.006</b>     | 0.315          | <b>0.003</b> |

The analysis was performed in cohort 1 (n = 42 for women and n = 63 for men). Multiple regression analysis was performed to identify significant correlations of WAT IL-10 with three other WAT cytokines when corrected to BMI.

Table S3: Linear regression of serum IL-10 with other circulating cytokines

|        | Women (IL-10) |                   | Men (IL-10) |                  |
|--------|---------------|-------------------|-------------|------------------|
|        | r-value       | p-value           | r-value     | P-value          |
| IFNg   | 0.651         | <b>&lt;0.001</b>  | -0.519      | <b>&lt;0.001</b> |
| IL-1b  | -0.611        | <b>0.001</b>      | -0.491      | <b>0.001</b>     |
| IL-6   | -0.679        | <b>&lt;0.001</b>  | -0.622      | <b>&lt;0.001</b> |
| MCP-1  | -0.622        | <b>&lt;0.001</b>  | -0.618      | <b>&lt;0.001</b> |
| TNFa   | -0.465        | <b>0.001</b>      | -0.678      | <b>&lt;0.001</b> |
| IL-1RA | -0.580        | <b>&lt;0.0001</b> | -0.639      | <b>&lt;0.001</b> |

The analysis was performed in cohort 1 (n = 42 for women and n = 63 for men). Circulating IL-10 levels did not correlate to BMI. Therefore, linear regressions were used for association analysis. Pearson r- and p- values are shown (significant values in bold).

**Table S4:** Spearman correlations of IL-10 production with measures of glucose metabolism

| <b>Women</b>        | <b>p-glucose</b> |                   | <b>HbA1c</b> |                | <b>HOMA-IR</b> |                   |
|---------------------|------------------|-------------------|--------------|----------------|----------------|-------------------|
|                     | <b>rho</b>       | <b>p-value</b>    | <b>rho</b>   | <b>p-value</b> | <b>rho</b>     | <b>p-value</b>    |
| IL-10 WAT secretion | <b>0.286</b>     | <b>0.066</b>      | <b>0.378</b> | <b>0.013</b>   | <b>0.414</b>   | <b>0.006</b>      |
| IL-10 mRNA          | <b>0.736</b>     | <b>&lt;0.0001</b> | <b>0.676</b> | <b>0.001</b>   | <b>0.742</b>   | <b>&lt;0.0001</b> |
| IL-10 Serum levels  | -0.029           | 0.849             | -0.193       | 0.203          | 0.086          | 0.569             |

| <b>Men</b>          | <b>p-glucose</b> |                | <b>HbA1c</b> |                | <b>HOMA-IR</b> |                |
|---------------------|------------------|----------------|--------------|----------------|----------------|----------------|
|                     | <b>rho</b>       | <b>p-value</b> | <b>rho</b>   | <b>p-value</b> | <b>rho</b>     | <b>p-value</b> |
| IL-10 WAT secretion | 0.156            | 0.221          | 0.124        | 0.331          | 0.170          | 0.186          |
| IL-10 mRNA          | 0.270            | 0.235          | 0.097        | 0.682          | 0.431          | 0.057          |
| IL-10 Serum levels  | -0.025           | 0.839          | -0.009       | 0.936          | 0.015          | 0.900          |

Spearman correlations were performed in cohort 1 (n = 42 for women and n = 63 for men).

## Supplementary figures

Figure S1: Intracellular staining protocol for flow cytometry

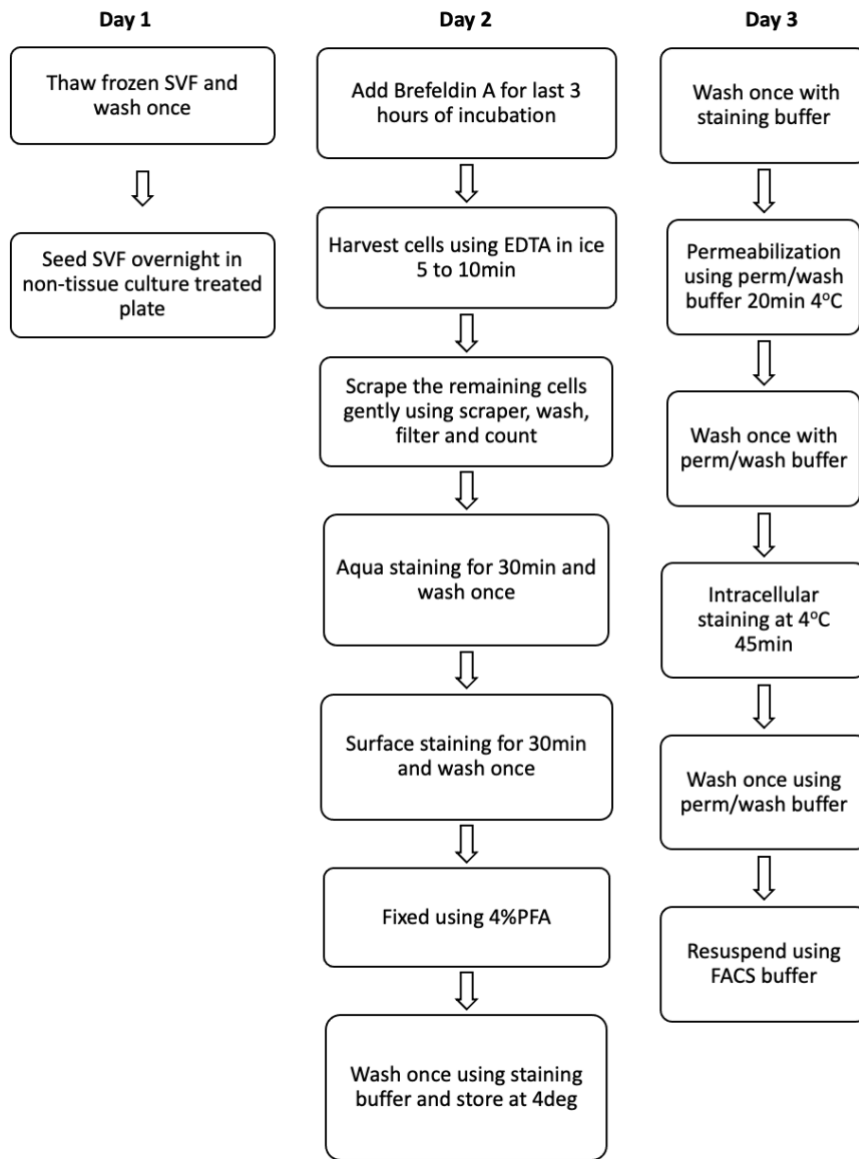

Step by step procedure for intracellular staining for flow cytometry is shown for day 1, 2 and 3.

Figure S2: Correlation of *IL10* to HOMA-IR in men and women in different depots

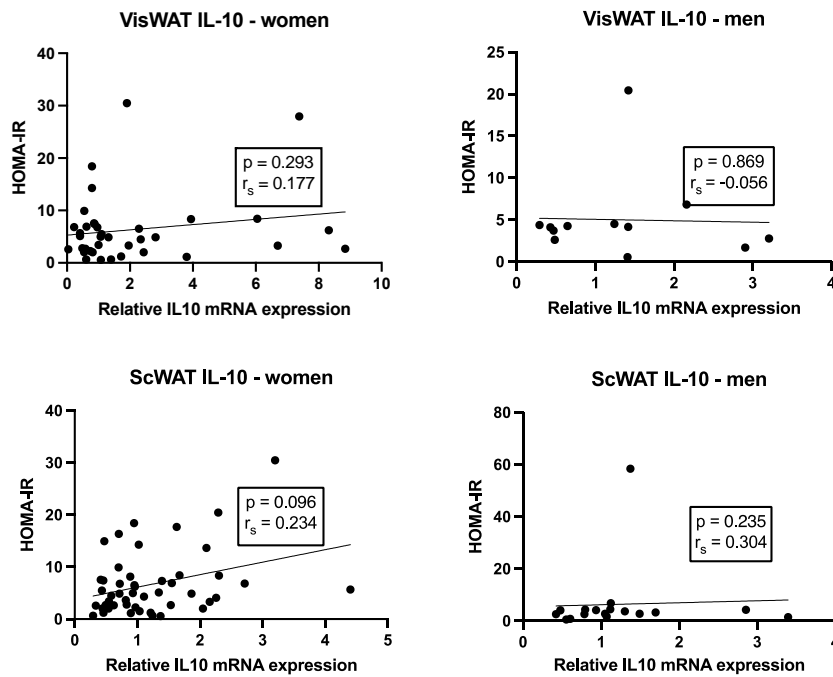

*IL10* expression in scWAT and visWAT was plotted against HOMA-IR in both men and women from cohort 2 (scWAT n = 51 obese women and 18 obese men; visWAT n = 39 obese women and 15 obese men), Spearman correlation was used to evaluate association for not normally distribution.
